# Supplementary material for: Efficient synthesis of 5-hydroxymethyl-, 5-formyl-, and 5-carboxyl-2′-deoxycytidine and their triphosphates
Source: Royal Society of Chemistry journal article supplement (doi:10.1039/c4ra07670b), 2014-01-01
Supplement: c4ra07670b1.pdf [file c4ra07670b1.pdf]

## Electronic Supplementary Information

### **Efficient synthesis of 5-hydroxymethyl-, 5-formyl-, and 5-carboxyl-2'-deoxycytidine and their triphosphates**

Qi Sun,<sup>a,\*</sup> Jian Sun,<sup>a</sup> Shan-Shan Gong,<sup>a</sup> Cheng-Jun Wang,<sup>a</sup> Shouzhi Pu,<sup>a</sup> and Fu-De Feng<sup>b,\*</sup>

<sup>a</sup> *Jiangxi Key Laboratory of Organic Chemistry, Jiangxi Science and Technology Normal University, Nanchang, Jiangxi 330013, PR China*

<sup>b</sup> *Department of Polymer Science & Engineering, College of Chemistry & Chemical Engineering, Nanjing University, Nanjing, Jiangsu 210093, PR China*  
E-mail: [sunqi96@tsinghua.org.cn](mailto:sunqi96@tsinghua.org.cn); [fengfd@nju.edu.cn](mailto:fengfd@nju.edu.cn)

#### Table of Contents

|                                                                                                   |              |
|---------------------------------------------------------------------------------------------------|--------------|
| 1. General methods                                                                                | Page S2      |
| 2. Synthetic procedures and characterization data for intermediates and products                  | Page S2–S9   |
| 3. <sup>1</sup> H, <sup>13</sup> C, and <sup>31</sup> P NMR spectra of intermediates and products | Page S10–S20 |
| 4. References                                                                                     | Page S21     |

## 1. General Methods.

Chemical reagents and solvents were obtained from commercial suppliers. 3',5'-diTBSdT (**7**) and tris(tetra-*n*-butylammonium) hydrogen pyrophosphate were prepared according to known procedures.<sup>1,2</sup> All reactions were performed under an atmosphere of dry argon and monitored by analytical thin-layer chromatography on plates coated with 0.25 mm silica gel 60 F<sub>254</sub>. TLC plates were visualized by 254 nm UV light. Ion exchange chromatography employed DEAE A-25 exchanger. All NMR spectra were obtained on a 400 MHz instrument with chemical shifts reported in parts per million (ppm,  $\delta$ ) and referenced to CDCl<sub>3</sub>, DMSO, or D<sub>2</sub>O. IR spectra were recorded on a FT-IR spectrometer. High-resolution mass spectra were obtained with a TOFQ mass spectrometer and reported as *m/z*. HPLC traces were recorded on an analytical instrument equipped with a C18 analytical column (4.6  $\times$  150 mm, 5  $\mu$ m) [flow rate = 1.0 mL/min; linear gradient of 5% to 90% MeOH in TEAB buffer (10 mM, pH 8.5) over 20 min; UV detection at 254 nm for **1** and **2**/275 nm for **3**].

## 2. Synthetic procedures and characterization data for intermediates and products.

### 3',5'-Di-*t*-butyldimethylsilyl-5-acetyloxymethyl-2'-deoxyuridine (**8**)

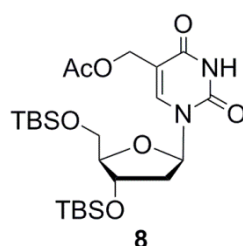

To a solution of **7** (12 g, 25.4 mmol) in dry CCl<sub>4</sub> (200 mL) were added recrystallized NBS (5.42 g, 30.4 mmol) and AIBN (100 mg, 0.61 mmol) at 60 °C. The reaction was refluxed for 30 min. Then, the second portion of recrystallized NBS (5.42 mg, 30.4 mmol) and AIBN (100 mg, 0.61 mmol) was added. After 1 h, the reaction mixture was cooled to room temperature and diluted with CHCl<sub>3</sub> (100 mL). The organic solution was washed with brine (200 mL), dried over anhydrous Na<sub>2</sub>SO<sub>4</sub>, and concentrated in vacuo. The residue was dissolved in DMF (20 mL). To the solution was added CH<sub>3</sub>COOK (4.98 g, 50.8 mmol). The resulting slurry was stirred at 40 °C for 30 min and diluted with EtOAc (200 mL). The organic solution was washed with H<sub>2</sub>O (200 mL) and brine (200 mL), dried over anhydrous Na<sub>2</sub>SO<sub>4</sub>, and concentrated in vacuo. Flash column chromatography (PE/EA 4:1) afforded the **8** (8.71 g, 65%) as a white solid.

### 3',5'-Di-*t*-butyldimethylsilyl-5-acetyloxymethyl-2'-deoxycytidine (**9**)

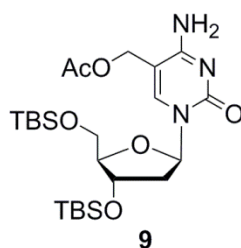

To a solution of **8** (4.22 g, 8.0 mmol), *N*-methylpiperidine (960 mg, 9.6 mmol), and Et<sub>3</sub>N (2.44 mL, 17.6 mmol) in dry CH<sub>3</sub>CN (80 mL) was added TsCl (3.36 g, 17.6 mmol) under an inert atmosphere at 0 °C. The reaction was stirred for 4 h. 28% NH<sub>4</sub>OH (20 mL) was added at 0 °C, and the reaction mixture was stirred at 20 °C for 30 min and diluted with EtOAc (400 mL). The organic solution was washed with brine (400 mL), dried over anhydrous Na<sub>2</sub>SO<sub>4</sub>, and concentrated in vacuo. Flash column chromatography (DCM/MeOH, 40:1) afforded the **9** (3.04 g, 72%) as a white solid. *R*<sub>f</sub> = 0.34 (DCM/MeOH, 20:1); <sup>1</sup>H NMR (400 MHz, CDCl<sub>3</sub>): 7.85 (s, 1H), 6.24 (t, *J* = 6.32 Hz, 1H), 4.81 (m, 2H), 4.33 (m, 1H), 3.94 (m, 1H), 3.76 (dd, 2H), 2.43 (m, 1H), 2.05 (s, 3H), 1.96 (m, 1H), 0.87 (s, 18 H), 0.06 (s, 12H) ppm; <sup>13</sup>C NMR (100 MHz, CDCl<sub>3</sub>): δ 171.3, 164.8, 155.4, 142.7, 100.6, 87.9, 86.3, 71.8, 62.8, 60.6, 42.3, 25.9, 25.7, 20.8, 18.4, 18.0, -4.6, -4.9, -5.4 ppm; IR: *v*<sub>max</sub> 2958, 2937, 2846, 1692, 1682, 1483, 1361, 1207, 1085, 1039, 559, 457 cm<sup>-1</sup>; HRMS (ESI<sup>+</sup>): *m/z* calcd for C<sub>24</sub>H<sub>44</sub>N<sub>3</sub>O<sub>6</sub>Si<sub>2</sub> [M+H]<sup>+</sup> 528.2847; found 528.2859.

### 3',5'-Di-*t*-butyldimethylsilyl-5-hydroxymethyl-2'-deoxycytidine (**10**)

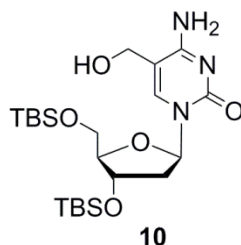

To a solution of **9** (2.64 g, 5.0 mmol) in MeOH (20 mL) were added K<sub>2</sub>CO<sub>3</sub> (1.38 g, 10.0 mmol) and H<sub>2</sub>O (2 mL). The reaction was stirred at 20 °C for 2 h and concentrated in vacuo. The residue was dissolved in EtOAc (100 mL) and washed with H<sub>2</sub>O (100 mL). The organic phase was dried over anhydrous Na<sub>2</sub>SO<sub>4</sub> and concentrated in vacuo. Flash column chromatography (DCM/MeOH 30:1) afforded the **10** (2.23 g, 92%) as a white solid.

### 3',5'-Di-*t*-butyldimethylsilyl-5-hydroxymethyl-2'-deoxyuridine (**11**)

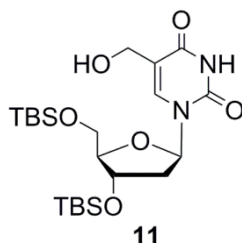

To a solution of **8** (4.22 g, 8.0 mmol) in MeOH (40 mL) were added K<sub>2</sub>CO<sub>3</sub> (2.20 g, 16.0 mmol) and H<sub>2</sub>O (4 mL). The reaction was stirred at 20 °C for 2 h and concentrated in vacuo. The residue was dissolved in EtOAc (200 mL) and washed with H<sub>2</sub>O (200 mL). The organic phase was dried over anhydrous Na<sub>2</sub>SO<sub>4</sub> and concentrated in vacuo. Flash column chromatography (PE/EA 2:1) afforded the **11** (3.54 g, 91%) as a white solid.

### 3',5'-Di-*t*-butyldimethylsilyl-5-formyl-2'-deoxyuridine (**12**)

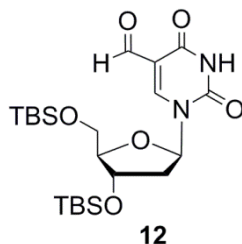

To a solution of **11** (2.92 g, 6.0 mmol) in DCM (40 mL) was added activated MnO<sub>2</sub> (10.44 g, 120.0 mmol). The reaction was stirred at 30 °C for 2 d. The reaction was cooled and filtered through a fritted funnel. The solid MnO<sub>2</sub> was washed with EtOAc (200 mL). The combined filtrate was concentrated in vacuo. Flash column chromatography (PE/EA 4:1) afforded the **12** (2.73 g, 94%) as a white solid.

### 3',5'-Di-*t*-butyldimethylsilyl-5-formyl-2'-deoxycytidine (**13**)

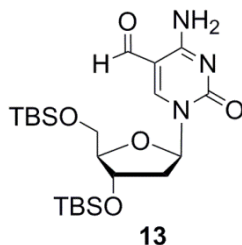

**Method A:** Compound **12** (2.42 g, 5 mmol) was used to synthesize **13** according to the procedure described for the preparation of **9**. Flash column chromatography (PE/EA 1:1) afforded the **13** (1.81 g, 75%) as a white solid.

**Method B:** To a solution of **10** (485 mg, 1.0 mmol) in DCM (6 mL) and H<sub>2</sub>O (3 mL)

were added TEMPO (31 mg, 0.2 mmol) and BAIB (354 mg, 1.1 mmol). The reaction was stirred at 20 °C for 2 h and diluted with EtOAc (50 mL). The organic solution was washed with Na<sub>2</sub>S<sub>2</sub>O<sub>3</sub> aqueous solution (2 M, 50 mL), dried over anhydrous Na<sub>2</sub>SO<sub>4</sub>, and concentrated in vacuo. Flash column chromatography (PE/EA 1:1) afforded the **13** (396 mg, 82%) as a white solid.

#### 5-Hydroxymethyl-2'-deoxycytidine (**4**)

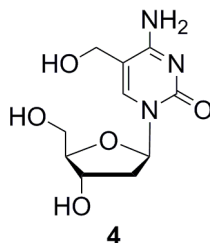

To a solution of **10** (2.9 g, 6 mmol) in THF (16 mL) were added 50% TFA aqueous solution (16 mL) at 20 °C. The reaction was stirred for 1 h and concentrated in vacuo. Flash column chromatography (DCM/MeOH 7:1) afforded the **4** (1.34 g, 87%) as a white solid.

#### 5-Formyl-2'-deoxycytidine (**5**)

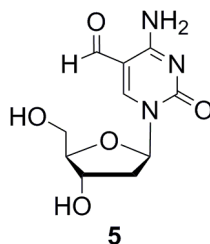

To a solution of **13** (2.9 g, 6 mmol) in THF (16 mL) were added 50% TFA aqueous solution (16 mL) at 20 °C. The reaction was stirred for 1 h and concentrated in vacuo. Flash column chromatography (DCM/MeOH 7:1) afforded the **5** (1.32 g, 86%) as a white solid.

#### 5-Carboxyl-2'-deoxycytidine (**6**)

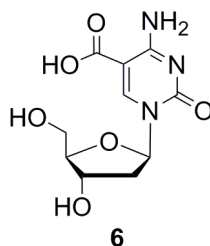

To a solution of **10** (2.91 g, 6.0 mmol) in DCM (50 mL) and H<sub>2</sub>O (15 mL) were added TEMPO (187 mg, 1.2 mmol) and BAIB (4.83 g, 15 mmol). The reaction was stirred at 20 °C for 8 h and diluted with EtOAc (200 mL). The organic solution was washed with 2 M Na<sub>2</sub>S<sub>2</sub>O<sub>3</sub> (200 mL), dried over anhydrous Na<sub>2</sub>SO<sub>4</sub> and concentrated in vacuo

to give the crude **14**. To a solution of crude **14** in THF (16 mL) were added 50% TFA aqueous solution (16 mL) at 20 °C. The reaction was stirred for 1 h and concentrated in vacuo. Flash column chromatography (DCM/MeOH 5:1 with 0.5% HOAc) afforded the **6** (1.10 g, 68%) as a white solid.

### 3'-*t*-Butyldimethylsilyl-5-formyl-2'-deoxycytidine (**15**)

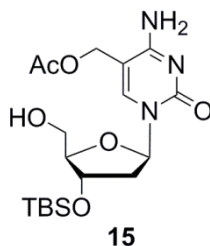

To a solution of **9** (528 mg, 1.0 mmol) in THF (8 mL) were added 50% TFA aqueous solution (4 mL). The reaction was stirred for 2 h at 0 °C. The reaction mixture was diluted with EtOAc (100 mL). The organic solution was washed with H<sub>2</sub>O (80 mL), saturated Na<sub>2</sub>CO<sub>3</sub> aqueous solution (80 mL), and brine (80 mL). The organic layer was dried over anhydrous Na<sub>2</sub>SO<sub>4</sub> and concentrated in vacuo. Flash column chromatography (DCM/MeOH 15:1) afforded the **15** (297 mg, 72%) as a white solid.  $R_f$  = 0.43 (DCM/MeOH 10:1); <sup>1</sup>H NMR (400 MHz, CDCl<sub>3</sub>): δ 8.24 (br, 1H), 7.97 (s, 1H), 6.12 (br, 1H), 6.08 (t,  $J$  = 6.2 Hz, 1H), 4.77 (s, 2H), 4.41 (m, 1H), 3.91 (m, 1H), 3.77 (dd, 2H), 2.26 (m, 2H), 1.98 (s, 3H), 0.82 (s, 9 H), 0.01 (s, 6H) ppm; <sup>13</sup>C NMR (100 MHz, CDCl<sub>3</sub>): δ 171.5, 164.9, 155.6, 144.3, 101.1, 88.1, 87.8, 61.5, 60.5, 41.5, 25.7, 20.9, 17.9, -4.7, -4.9 ppm; IR:  $\nu_{\max}$  2960, 1722, 1374, 1258, 1017, 763, 559, 457 cm<sup>-1</sup>; HRMS (ESI<sup>+</sup>):  $m/z$  calcd for C<sub>18</sub>H<sub>31</sub>N<sub>3</sub>O<sub>6</sub>Si [M+H]<sup>+</sup> 414.1932; found 414.1917.

### 5-Hydroxymethyl-2'-deoxycytidine 5'-monophosphate, disodium salt (**16**)

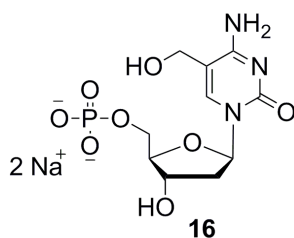

To a solution of **15** (515 mg, 1.25 mmol) in dry PO(OCH<sub>3</sub>)<sub>3</sub> (10 mL) were added POCl<sub>3</sub> (380 mg, 2.5 mmol). The reaction was stirred at 0 °C for 2 h. The reaction mixture was then quenched by the slow addition of 0.1 M triethylammonium bicarbonate (TEAB) buffer (40 mL) followed by extraction with diethyl ether (40 mL×3). The aqueous layer was collected and concentrated in vacuo. To the residue were added TFA (5 mL) and H<sub>2</sub>O (5 mL). The reaction was stirred at 20 °C for 1 h and concentrated in vacuo. MeOH (10 mL), K<sub>2</sub>CO<sub>3</sub> (345 mg, 2.5 mmol), and H<sub>2</sub>O (1 mL) were added to the solution. The reaction was stirred at 20 °C for 1 h and concentrated in vacuo. The crude product was dissolved in deionized H<sub>2</sub>O (0.5 mL) and loaded on a DEAE Sephadex A-25 ion exchange column (1.6 × 25 cm). Elution

with  $\text{NH}_4\text{HCO}_3$  buffer (linear gradient 0.1 to 0.4 M), combination of appropriate fractions, and lyophilization afforded the **16** in ammonium salt form. Passage of the solution of the ammonium salt in deionized  $\text{H}_2\text{O}$  through a bed of Dowex 50W-X8 ion exchange resin ( $\text{Na}^+$  form) and lyophilization afforded the **16** (299 mg, 64%) as disodium salt, a white solid;  $^1\text{H}$  NMR (400 MHz,  $\text{D}_2\text{O}$ ):  $\delta$  7.90 (s,  $J = 6.6$  Hz, 1H), 4.42 (m, 3H), 4.02 (m, 1H), 3.77 (dd, 2H), 2.40 (m, 1H), 2.29 (m, 1H) ppm;  $^{13}\text{C}$  NMR (100 MHz,  $\text{D}_2\text{O}$ ):  $\delta$  163.8, 155.7, 140.4, 106.2, 86.3, 85.8, 69.9, 60.7, 57.2, 38.9 ppm;  $^{31}\text{P}$  NMR (162 MHz,  $\text{D}_2\text{O}$ ):  $\delta$  0.13 ppm; IR:  $\nu_{\text{max}}$  3354, 2937, 2846, 2677, 1682, 1085, 1039, 932, 508, 455  $\text{cm}^{-1}$ ; HRMS (ESI $^-$ ):  $m/z$  calcd for  $\text{C}_{10}\text{H}_{16}\text{N}_3\text{O}_8\text{P}$  [ $\text{M}-\text{H}$ ] $^-$  336.0686; found 336.0656.

**5-Hydroxymethyl-2'-deoxycytidine 5'-phosphoropiperidate, triethylammonium salt (17)**

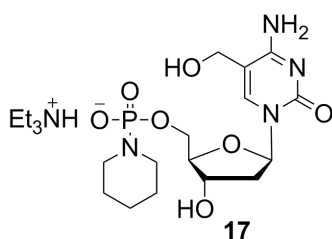

To a solution of **16** (175 mg, 0.4 mmol, triethylammonium salt) and piperidine (170 mg, 2.0 mmol) in DMSO (4 mL) were added 2,2'-dithiodianiline (300 mg, 1.2 mmol) and triphenylphosphine (260mg, 1 mmol). The solution was stirred at 20 °C for 8 h. A solution of NaI in acetone (0.5 M, 5 mL) was added dropwise to the reaction mixture. The resulting white precipitate was collected by centrifuge. Passage of the solution of the sodium salt in deionized  $\text{H}_2\text{O}$  through a bed of Dowex 50W-X8 ion exchange resin ( $\text{Et}_3\text{NH}^+$  form) and lyophilization afforded **17** (190 mg, 94%) as white foam;  $^1\text{H}$  NMR (400 MHz,  $\text{D}_2\text{O}$ ):  $\delta$  7.94 (s, 1H), 6.25 (d,  $J = 6.6$  Hz, 1H), 4.54 (m, 1H), 4.50 (s, 1H), 3.96 (dd, 2H), 3.17 (q,  $J = 7.2$  Hz, 6H), 2.91 (m, 4H), 1.35 (m, 6H), 2.49 (m, 1H), 2.44 (m, 1H), 1.43 (m, 4H), 1.25 (t,  $J = 7.2$  Hz, 9H) ppm;  $^{13}\text{C}$  NMR (100 MHz,  $\text{D}_2\text{O}$ ):  $\delta$  165.1, 157.4, 140.6, 106.7, 86.5, 86.2, 71.1, 64.0, 57.8, 45.8, 44.6, 40.0, 25.7, 24.1, 8.3 ppm;  $^{31}\text{P}$  NMR (162 MHz,  $\text{D}_2\text{O}$ ):  $\delta$  7.96 ppm; IR:  $\nu_{\text{max}}$  3459, 1660, 1561, 1453, 1332, 1123, 967, 754, 654  $\text{cm}^{-1}$ ; HRMS (ESI $^-$ ):  $m/z$  calcd for  $\text{C}_{15}\text{H}_{25}\text{N}_4\text{O}_7\text{P}$  [ $\text{M}-\text{H}$ ] $^-$  403.1461; found 403.1449.

**5-Formyl-2'-deoxycytidine 5'-phosphoropiperidate, triethylammonium salt (18)**

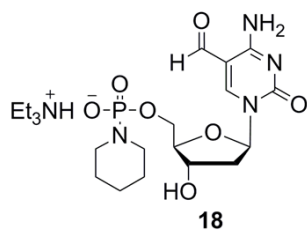

To a solution of **17** (101 mg, 0.2 mmol) in MeOH (5 mL) was added activated  $\text{MnO}_2$  (174 mg, 2 mmol). The reaction was stirred at 50 °C for 24 h. The reaction solution was cooled and filtered through a fritted funnel. The  $\text{MnO}_2$  was washed with MeOH



described for **1**. Passage of the solution of the ammonium salt in deionized H<sub>2</sub>O through a bed of Dowex 50W-X8 ion exchange resin (Na<sup>+</sup> form) and lyophilization afforded **2** (44 mg, 76%) as tetrasodium salt, a white solid; <sup>1</sup>H NMR (400 MHz, D<sub>2</sub>O):  $\delta$  9.58 (s, 1H), 8.81 (s, 1H), 6.16 (t,  $J$  = 5.9 Hz, 1H), 4.57 (m, 1H), 4.22 (m, 3H), 2.40 (m, 2H) ppm; <sup>13</sup>C NMR (100 MHz, D<sub>2</sub>O):  $\delta$  191.5, 162.8, 155.5, 154.6, 105.9, 87.2, 86.0, 69.5, 64.7, 40.0 ppm; <sup>31</sup>P NMR (162 MHz, D<sub>2</sub>O):  $\delta$  -6.7 (d,  $J_{\text{P-}\gamma,\text{P-}\beta}$  = 19.7 Hz, 1P), -11.3 (d,  $J_{\text{P-}\alpha,\text{P-}\beta}$  = 18.8 Hz, 1P), -22.2 (dd,  $J_{\text{P-}\beta,\text{P-}\alpha}$  =  $J_{\text{P-}\beta,\text{P-}\gamma}$  = 19.6 Hz, 1P) ppm; IR:  $\nu_{\text{max}}$  3338, 2947, 2570, 2311, 1889, 1176, 1087, 758, 508 cm<sup>-1</sup>; HRMS (ESI<sup>-</sup>):  $m/z$  calcd for C<sub>10</sub>H<sub>16</sub>N<sub>3</sub>O<sub>14</sub>P<sub>3</sub> [M-H]<sup>-</sup> 493.9867; found 493.9888.

### 5-Carboxyl-2'-deoxycytidine 5'-triphosphate, tetrasodium salt (**3**)

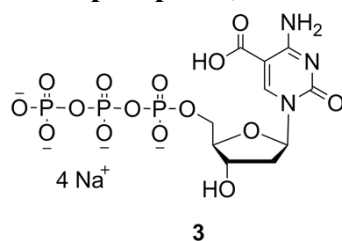

To a solution of **1** (49 mg, 0.1 mmol, triethylammonium salt) in *t*BuOH/DCM/H<sub>2</sub>O (2/2/0.5 mL) were added TEMPO (6.2 mg, 0.04 mmol) and BAIB (81 mg, 0.25 mmol). The reaction was stirred at 20 °C for 48 h and diluted with H<sub>2</sub>O (10 mL). The solution was washed with DCM (10 mL). The aqueous layer was collected and concentrated in vacuo. The residue was dissolved in deionized H<sub>2</sub>O (0.5 mL) and loaded on a DEAE Sephadex A-25 ion exchange column (1.6 × 25 cm). Elution with NH<sub>4</sub>HCO<sub>3</sub> buffer (linear gradient 0.2 to 0.7 M), combination of appropriate fractions, and lyophilization afforded **3** in ammonium salt form. Passage of the solution of the ammonium salt in deionized H<sub>2</sub>O through a bed of Dowex 50W-X8 ion exchange resin (Na<sup>+</sup> form) and lyophilization afforded **3** (47 mg, 78%) as tetrasodium salt, a white solid; <sup>1</sup>H NMR (400 MHz, D<sub>2</sub>O):  $\delta$  8.39 (s, 1H), 6.23 (t,  $J$  = 6.5 Hz, 1H), 4.56 (m, 1H), 4.18 (m, 3H), 2.36 (dd, 2H) ppm; <sup>13</sup>C NMR (100 MHz, D<sub>2</sub>O):  $\delta$  170.1, 164.6, 156.3, 146.0, 103.0, 86.1, 85.0, 70.4, 65.2, 38.5 ppm; <sup>31</sup>P NMR (162 MHz, D<sub>2</sub>O):  $\delta$  -9.1 (d,  $J_{\text{P-}\gamma,\text{P-}\beta}$  = 18.3 Hz, 1P), -10.8 (d,  $J_{\text{P-}\alpha,\text{P-}\beta}$  = 17.9 Hz, 1P), -22.2 (dd,  $J_{\text{P-}\beta,\text{P-}\alpha}$  =  $J_{\text{P-}\beta,\text{P-}\gamma}$  = 18.4 Hz, 1P) ppm; IR:  $\nu_{\text{max}}$  3606, 1570, 2311, 1678, 931, 794, 621, 465 cm<sup>-1</sup>; HRMS (ESI<sup>-</sup>):  $m/z$  calcd for C<sub>10</sub>H<sub>16</sub>N<sub>3</sub>O<sub>15</sub>P<sub>3</sub> [M-H]<sup>-</sup> 509.9816; found 509.9843.

### 3. $^1\text{H}$ , $^{13}\text{C}$ , and $^{31}\text{P}$ NMR spectra of intermediates and products.

Figure S1.  $^1\text{H}$  NMR Spectrum of **9**

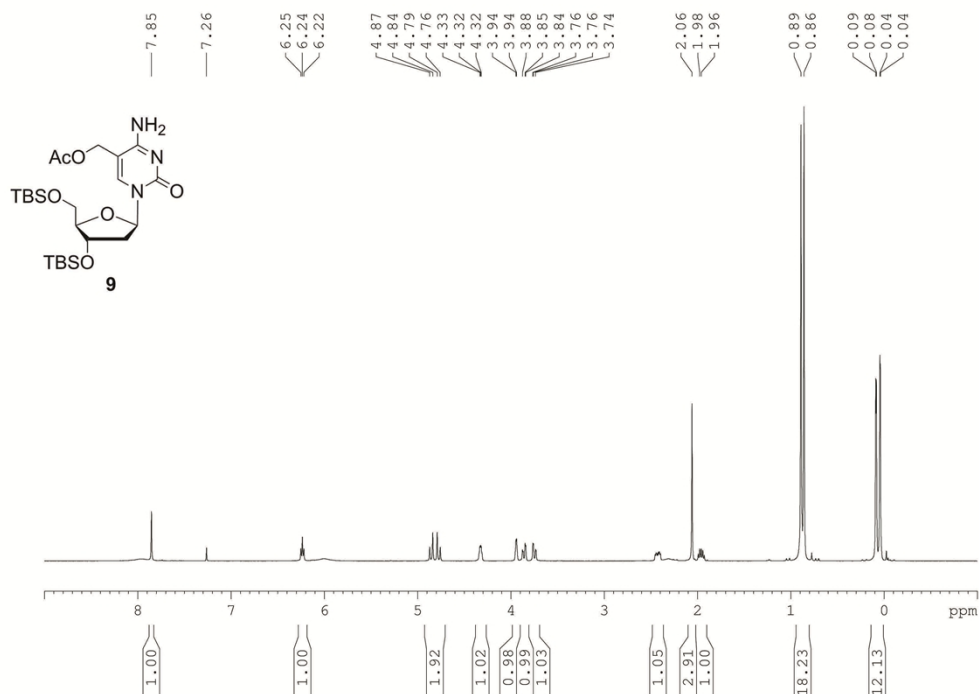

Figure S2.  $^{13}\text{C}$  NMR Spectrum of **9**

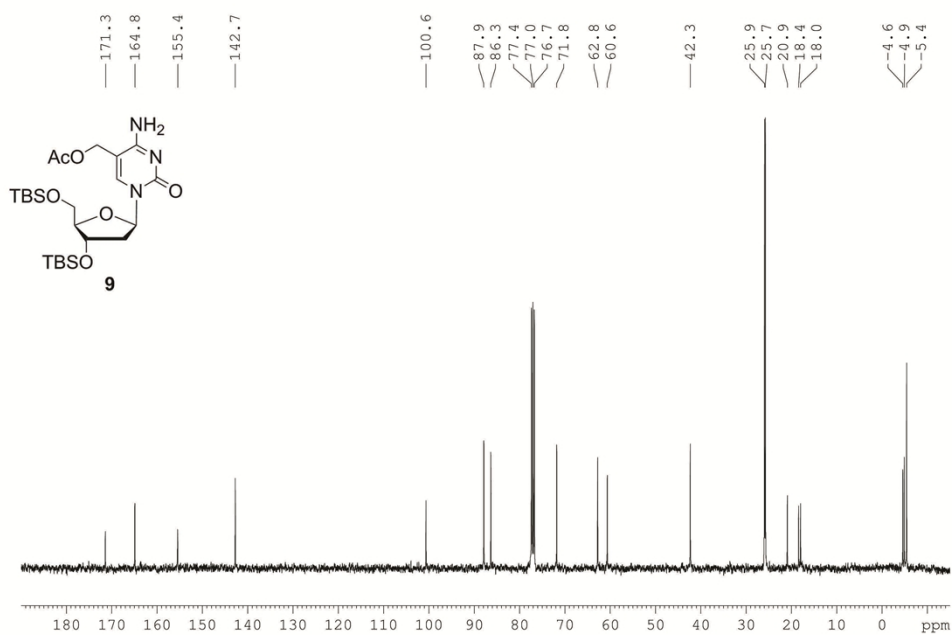

Figure S3.  $^1\text{H}$  NMR Spectrum of **15**

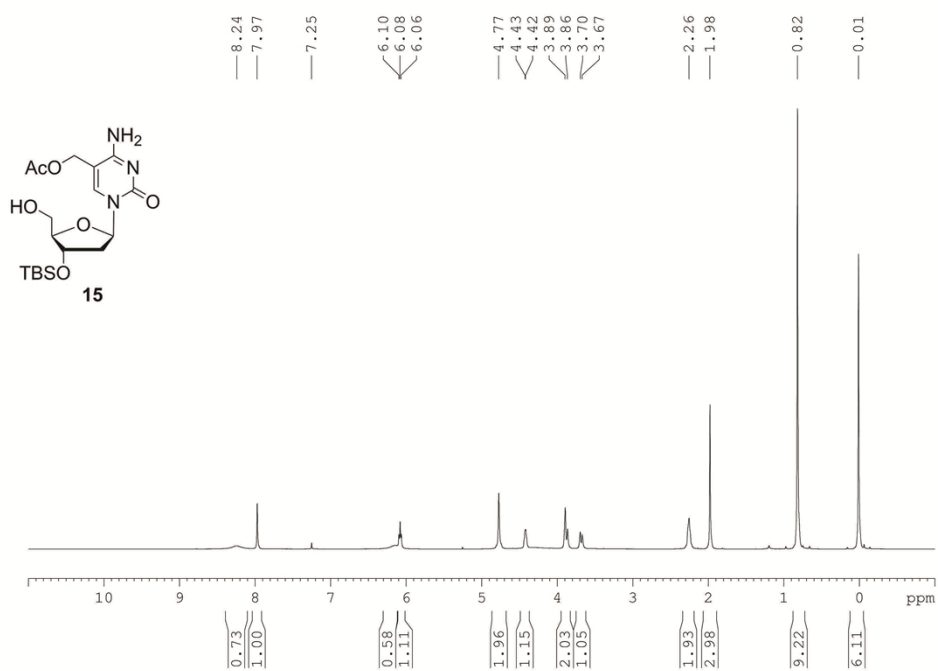

Figure S4.  $^{13}\text{C}$  NMR Spectrum of **15**

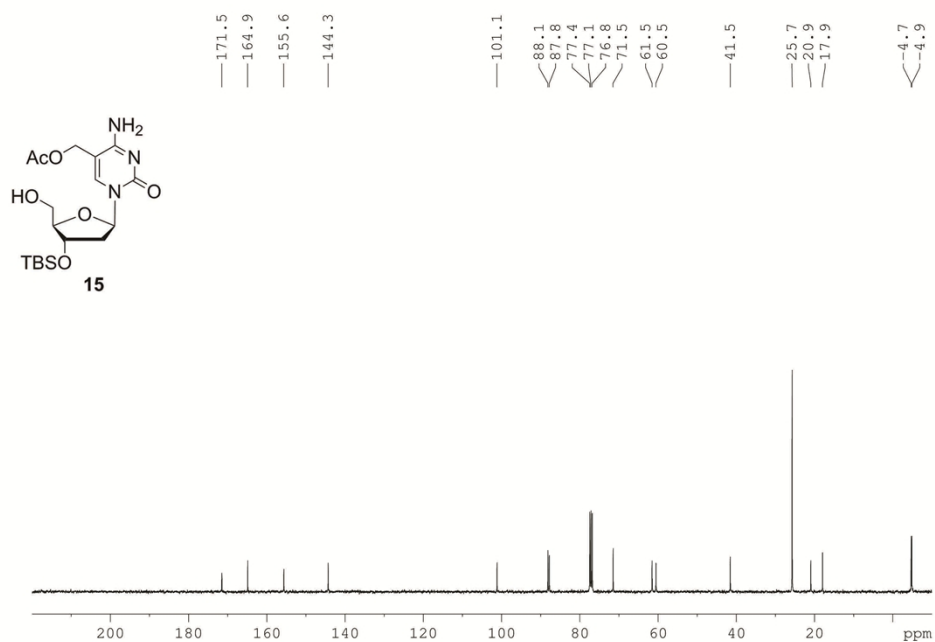

Figure S5.  $^1\text{H}$  NMR Spectrum of **16**

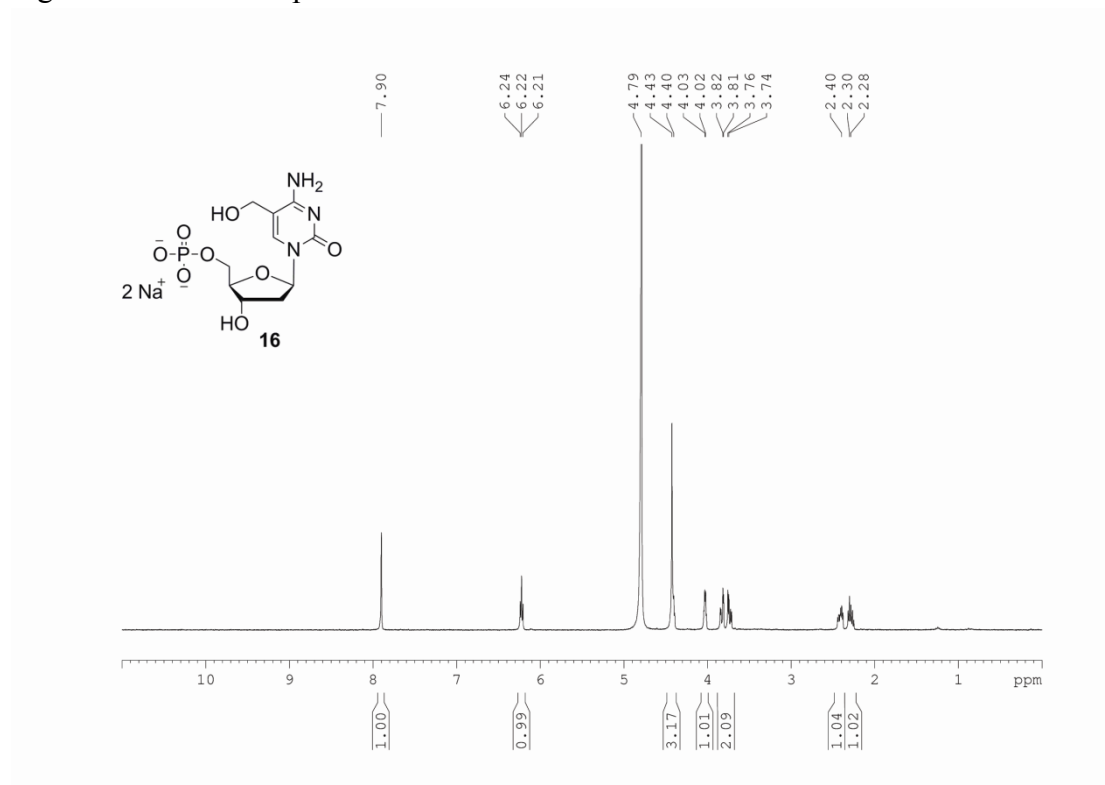

Figure S6.  $^{13}\text{C}$  NMR Spectrum of **16**

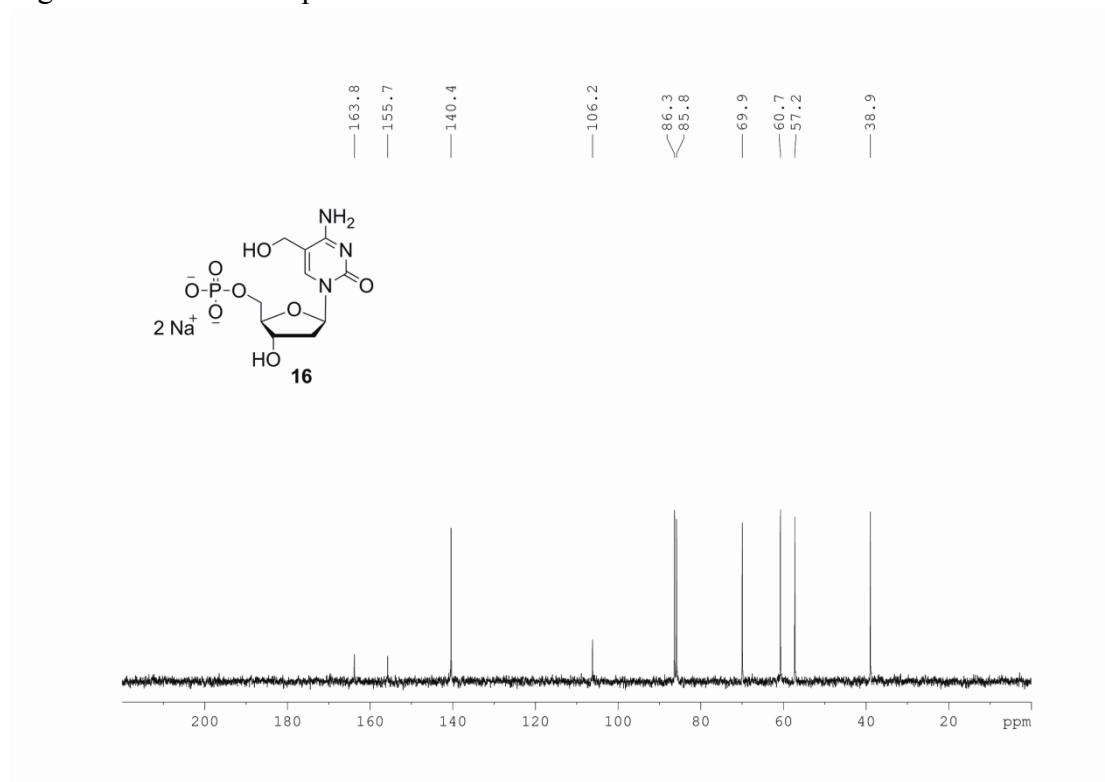

Figure S7.  $^{31}\text{P}$  NMR Spectrum of **16**

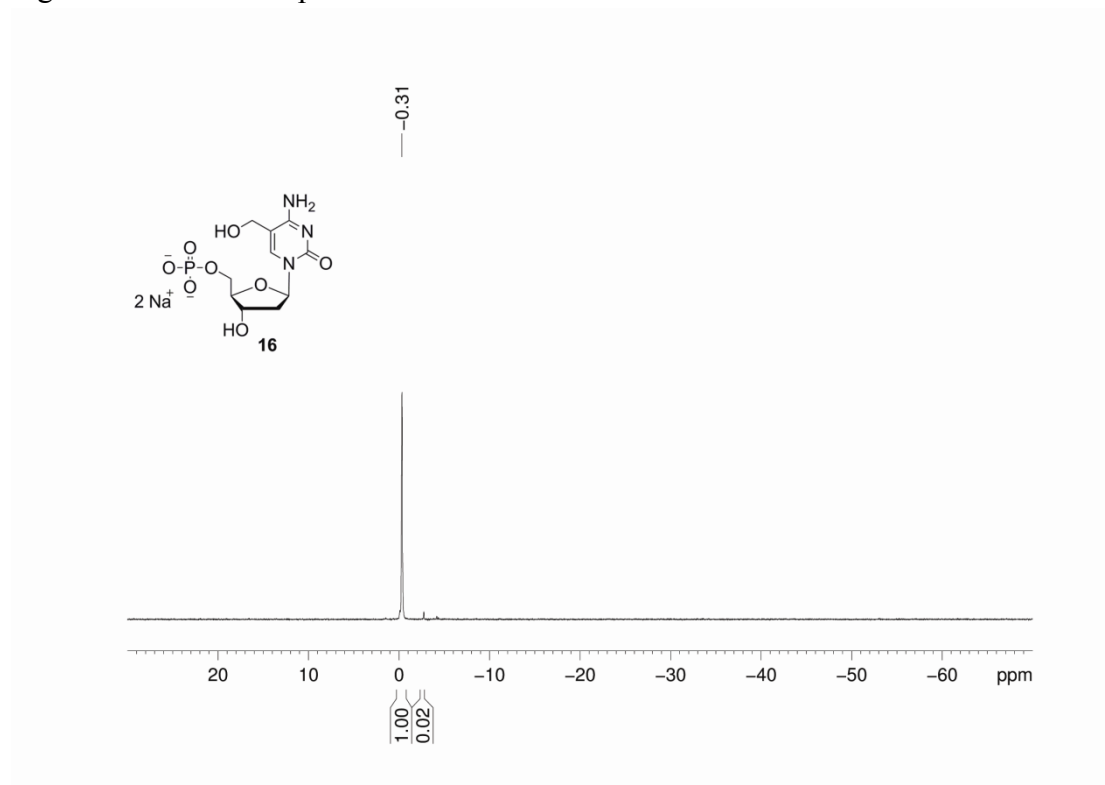

Figure S8.  $^1\text{H}$  NMR Spectrum of **17**

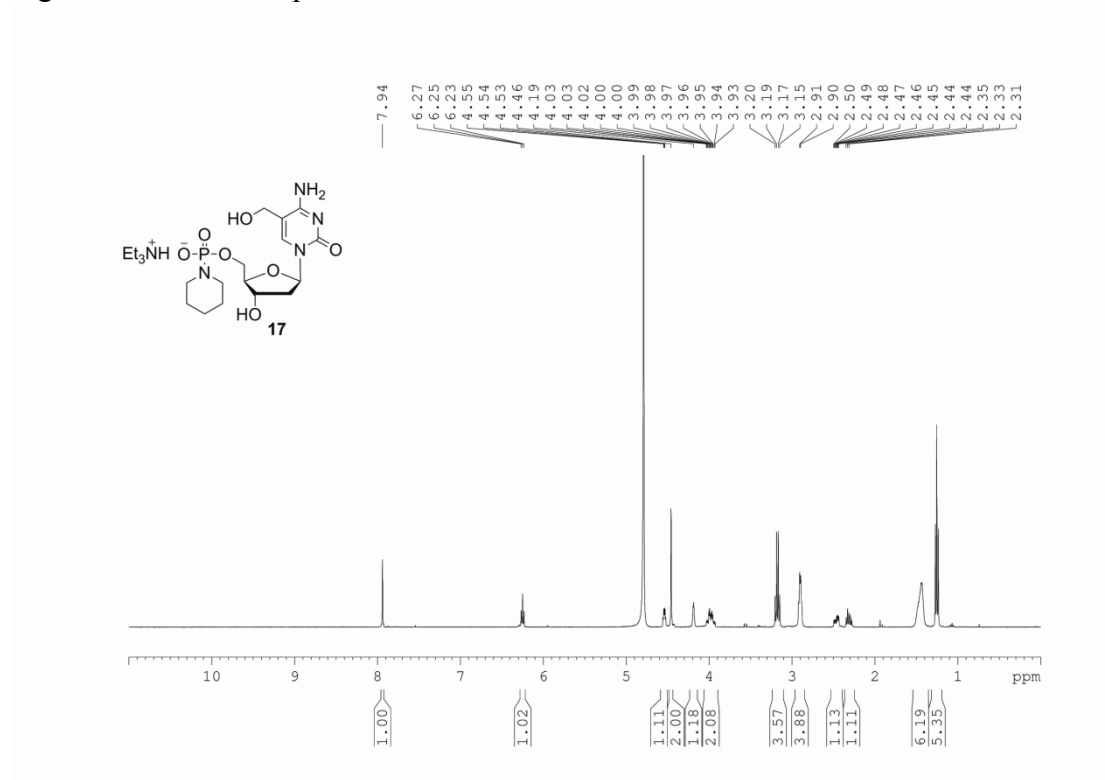

Figure S9.  $^{13}\text{C}$  NMR Spectrum of **17**

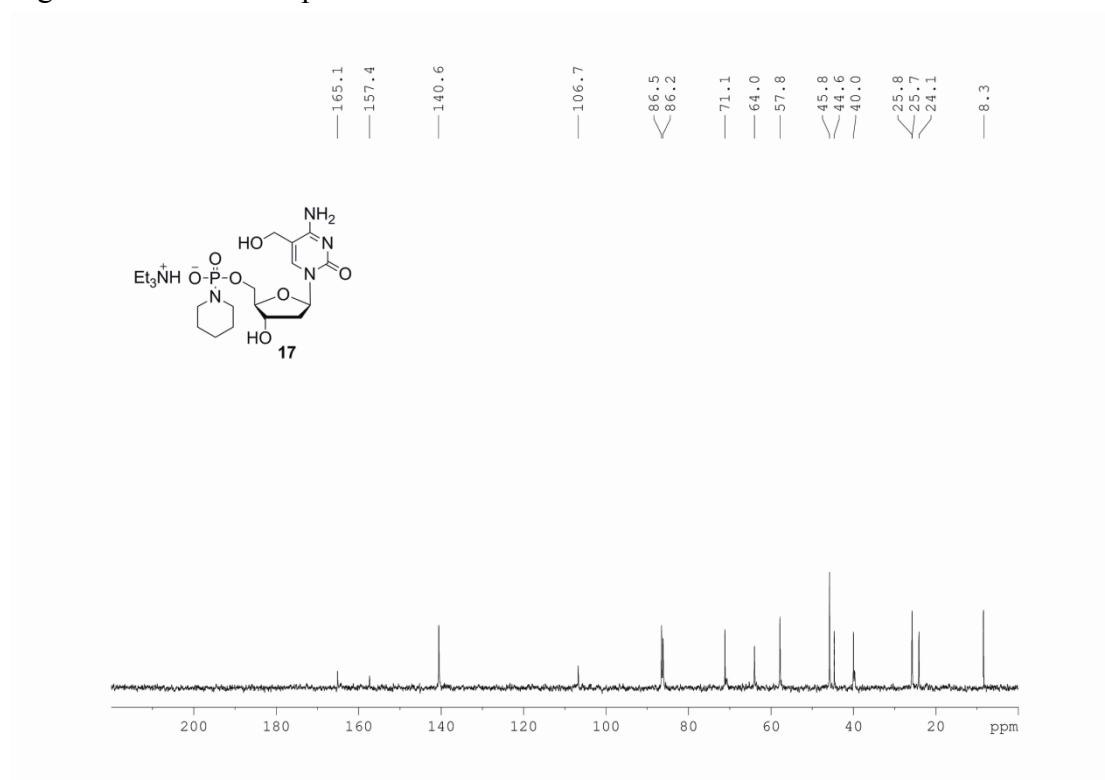

Figure S10.  $^{31}\text{P}$  NMR Spectrum of **17**

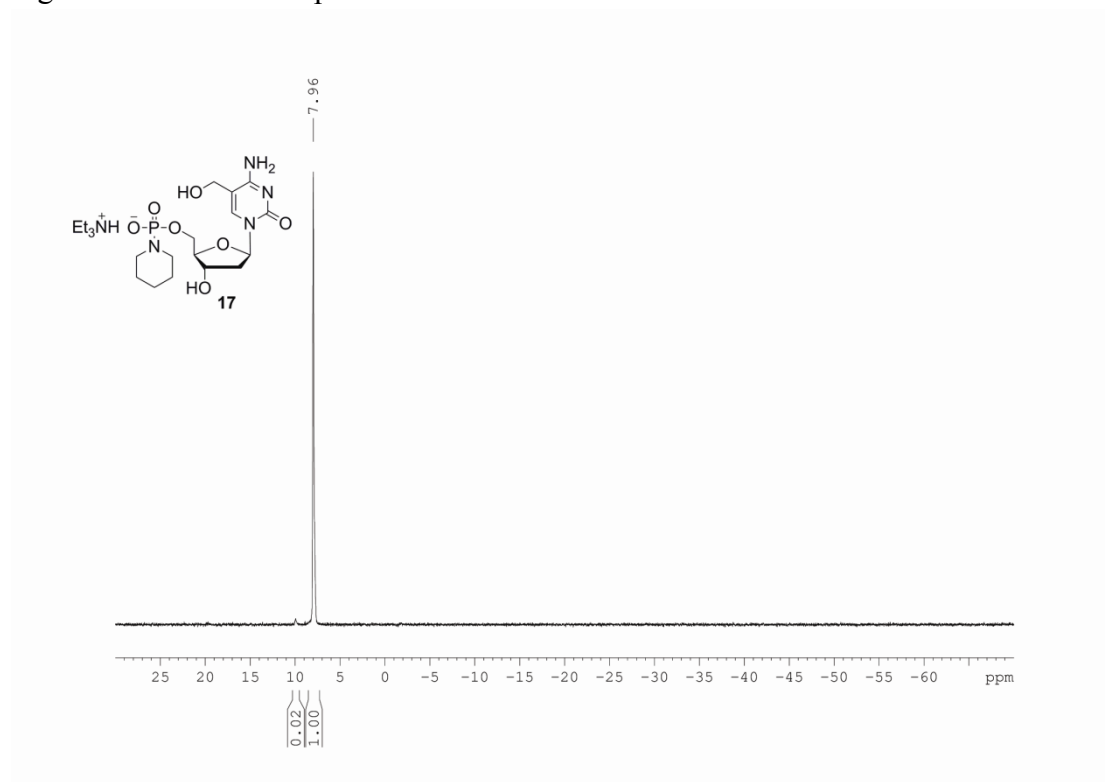

Figure S11. <sup>1</sup>H NMR Spectrum of **18**

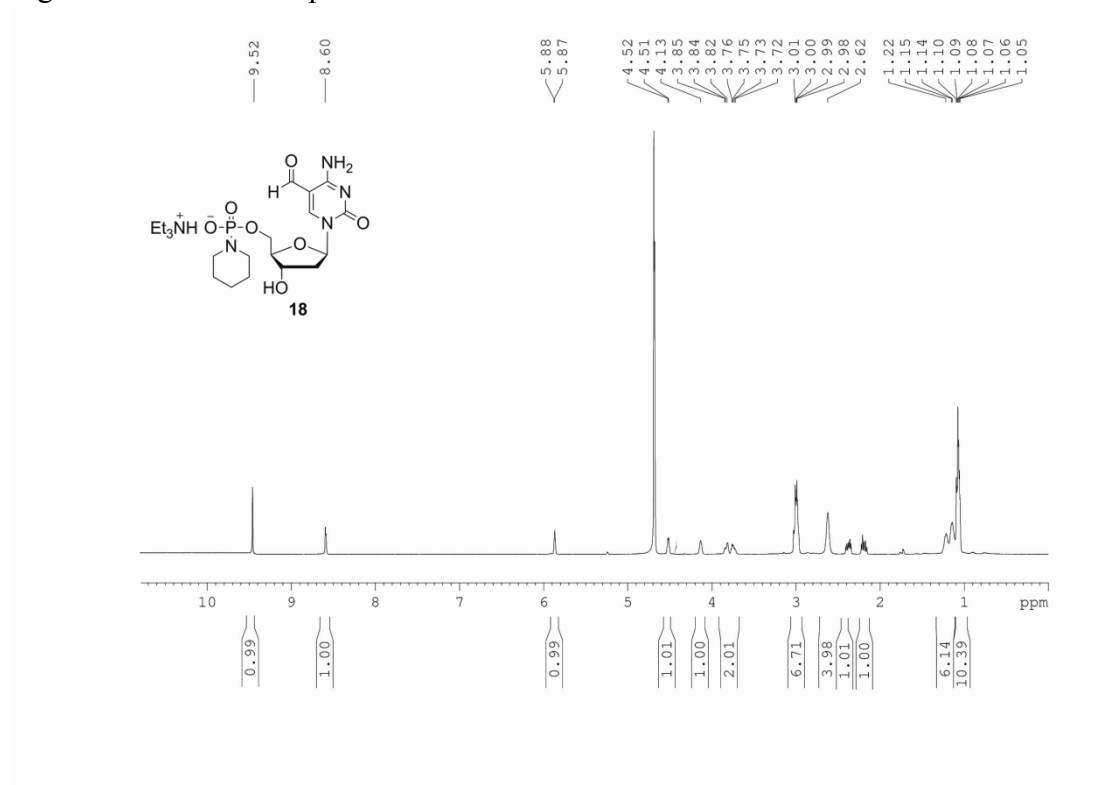

Figure S12. <sup>13</sup>C NMR Spectrum of **18**

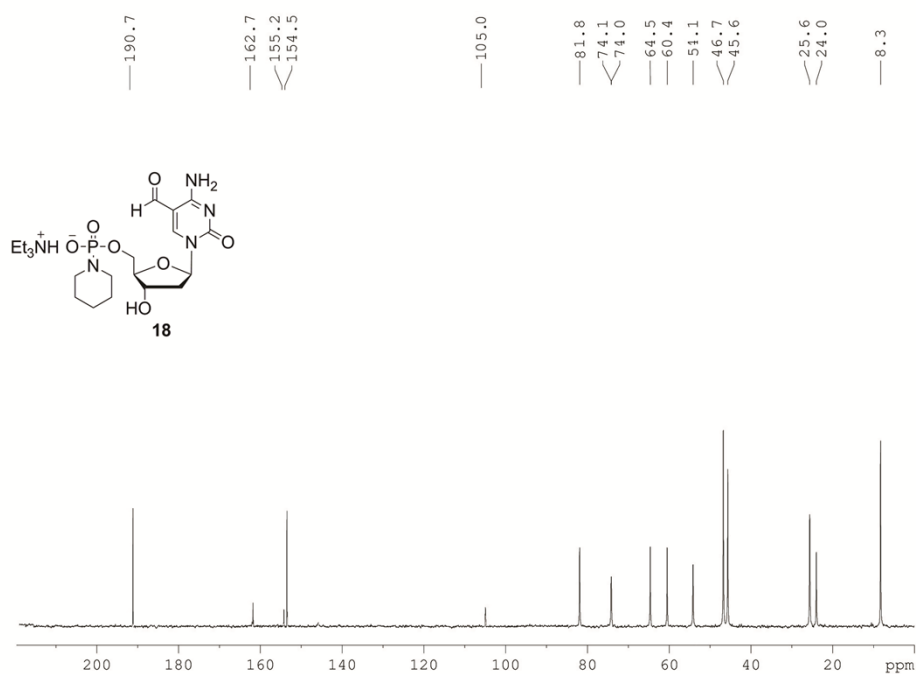

Figure S13.  $^{31}\text{P}$  NMR Spectrum of **18**

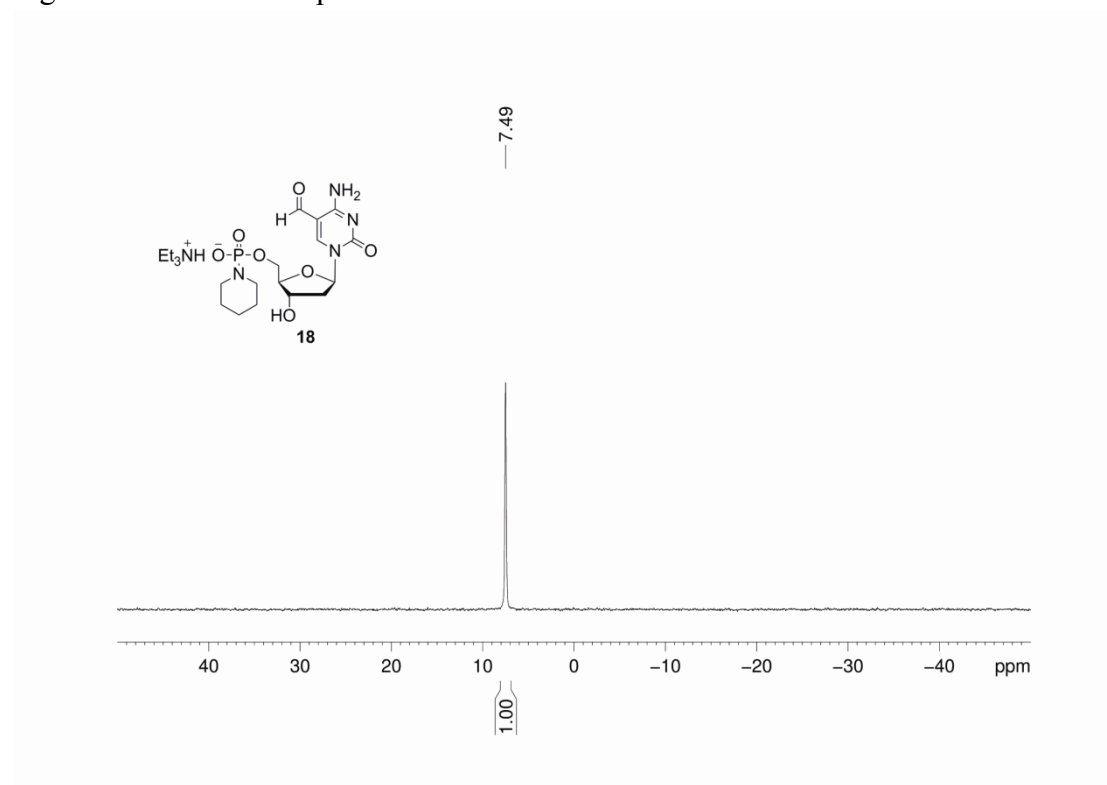

Figure S14.  $^1\text{H}$  NMR Spectrum of **1**

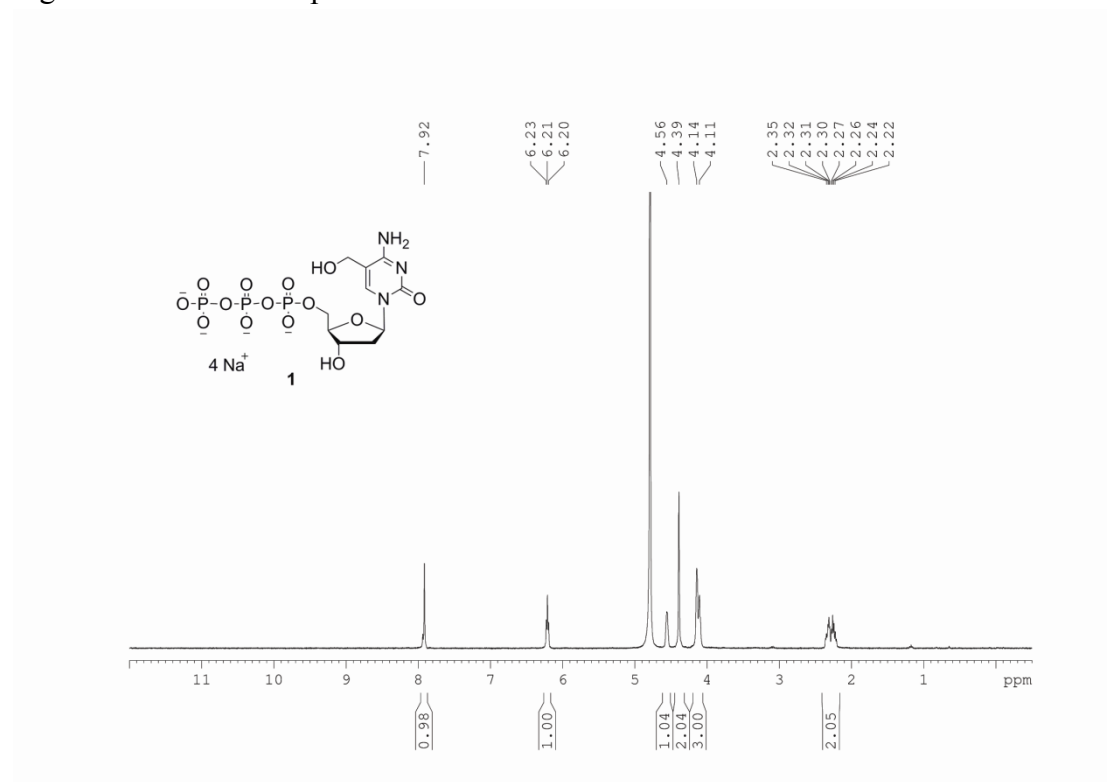

Figure S15.  $^{13}\text{C}$  NMR Spectrum of **1**

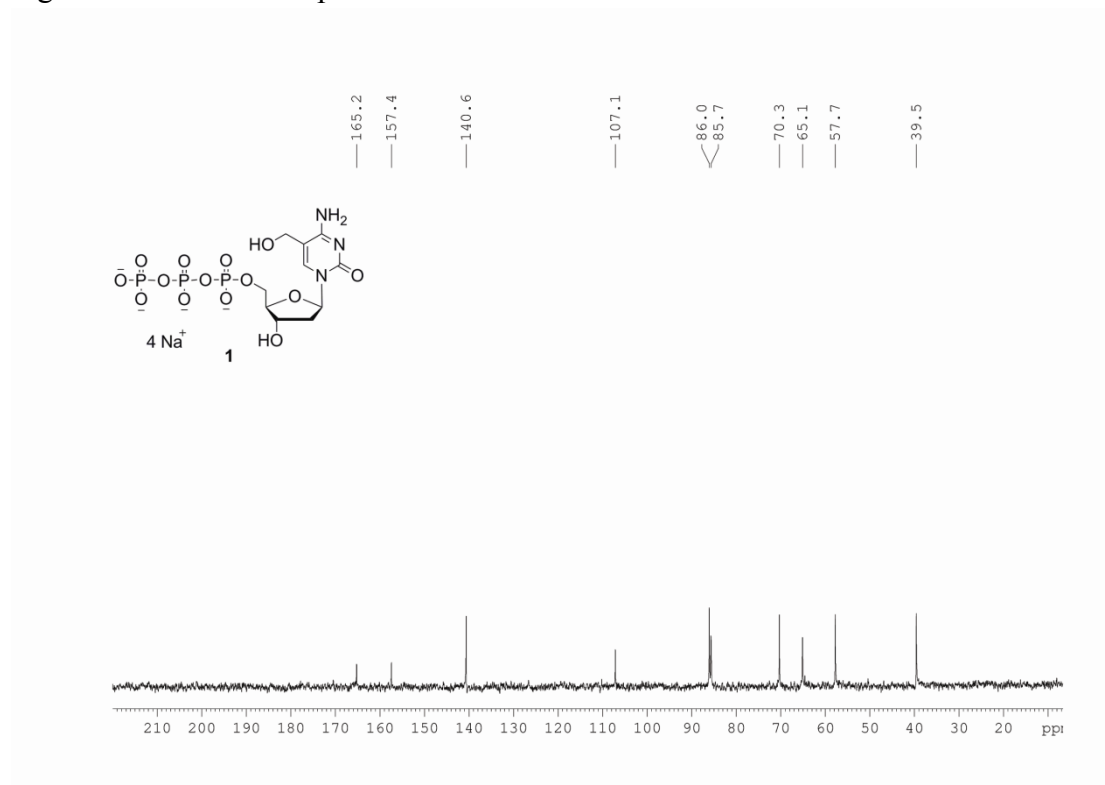

Figure S16.  $^{31}\text{P}$  NMR Spectrum of **1**

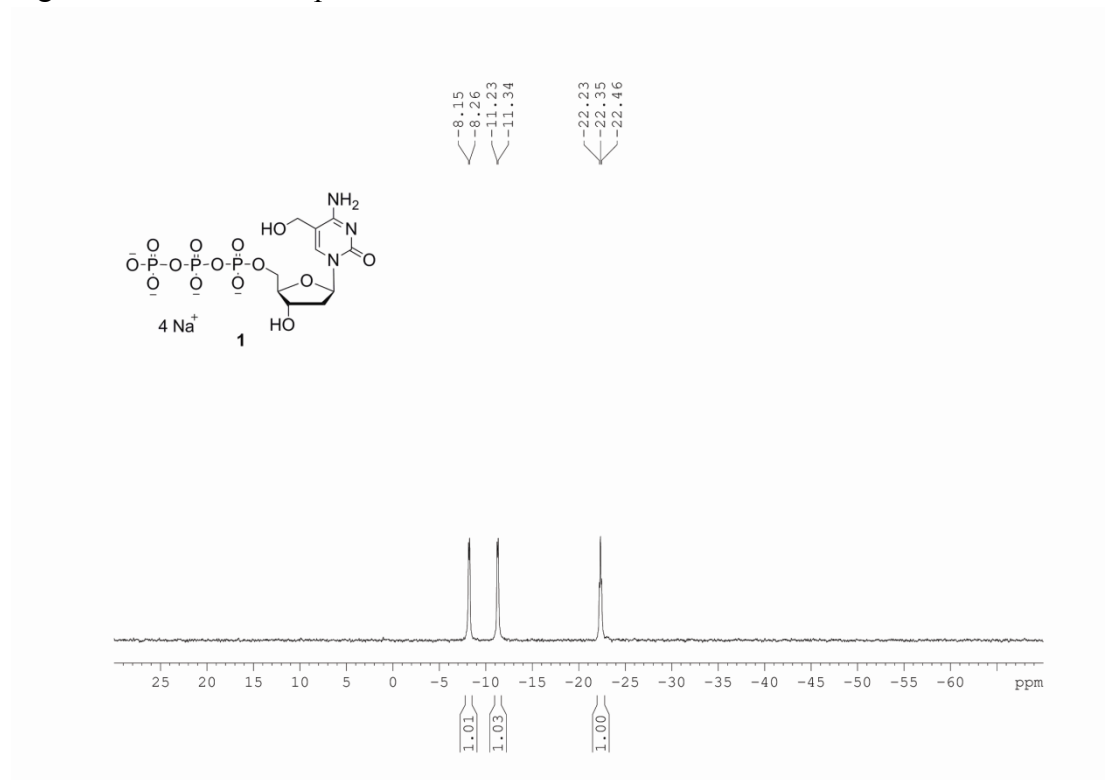

Figure S17.  $^1\text{H}$  NMR Spectrum of **2**

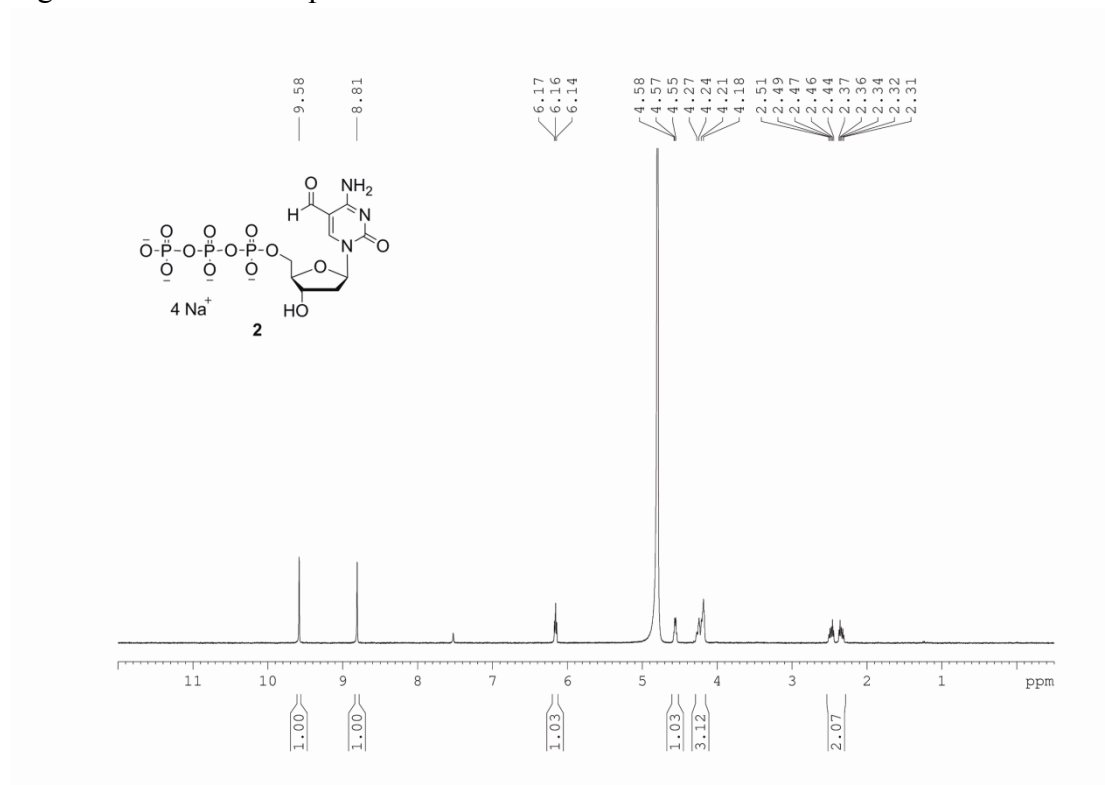

Figure S18.  $^{13}\text{C}$  NMR Spectrum of **2**

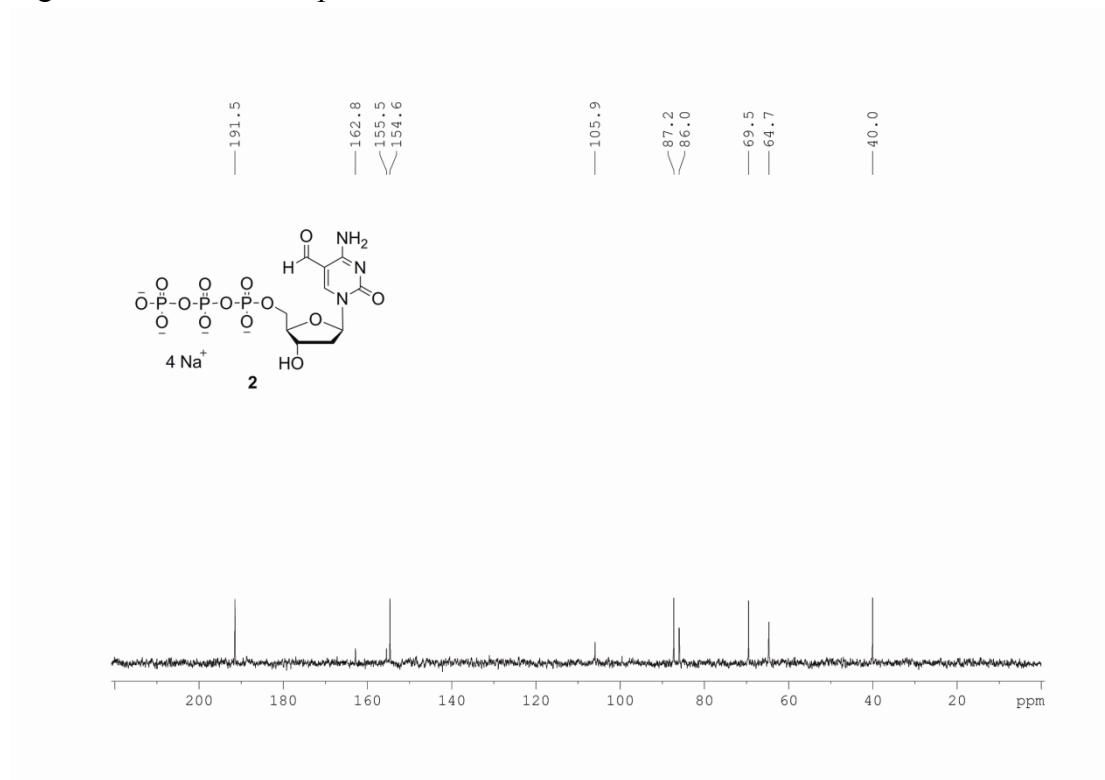

Figure S19.  $^{31}\text{P}$  NMR Spectrum of **2**

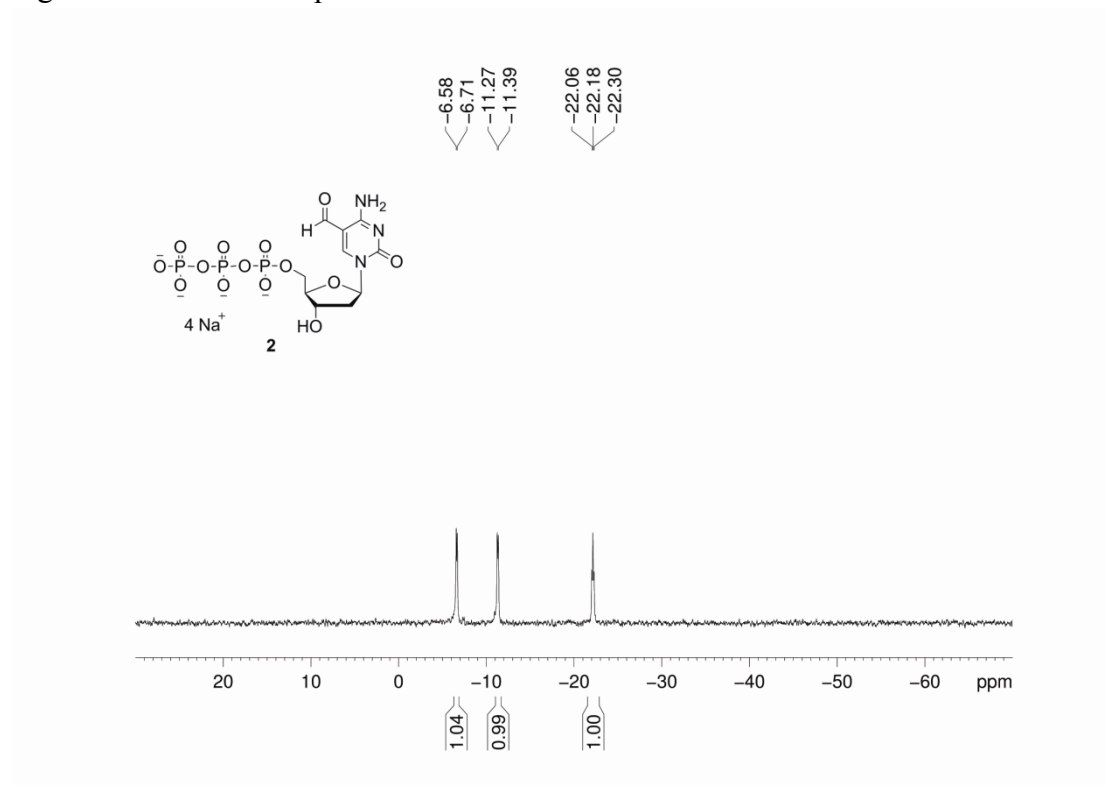

Figure S20.  $^1\text{H}$  NMR Spectrum of **3**

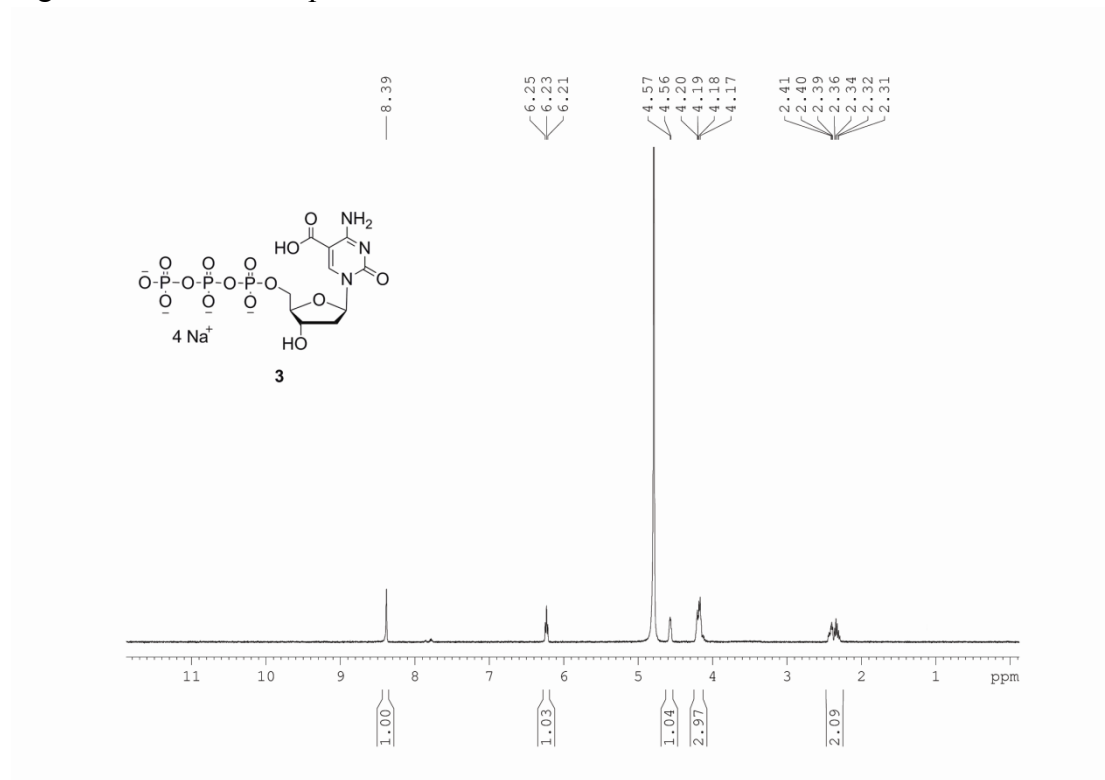

Figure S21.  $^{13}\text{C}$  NMR Spectrum of **3**

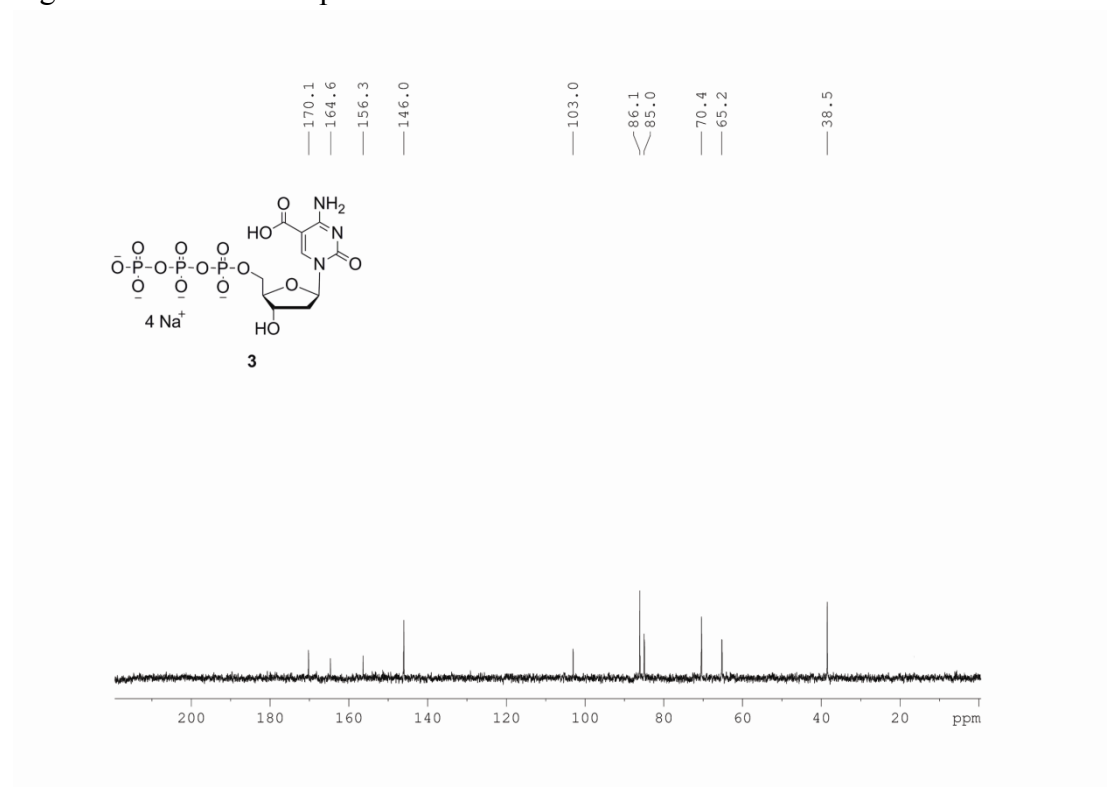

Figure S22.  $^{31}\text{P}$  NMR Spectrum of **3**

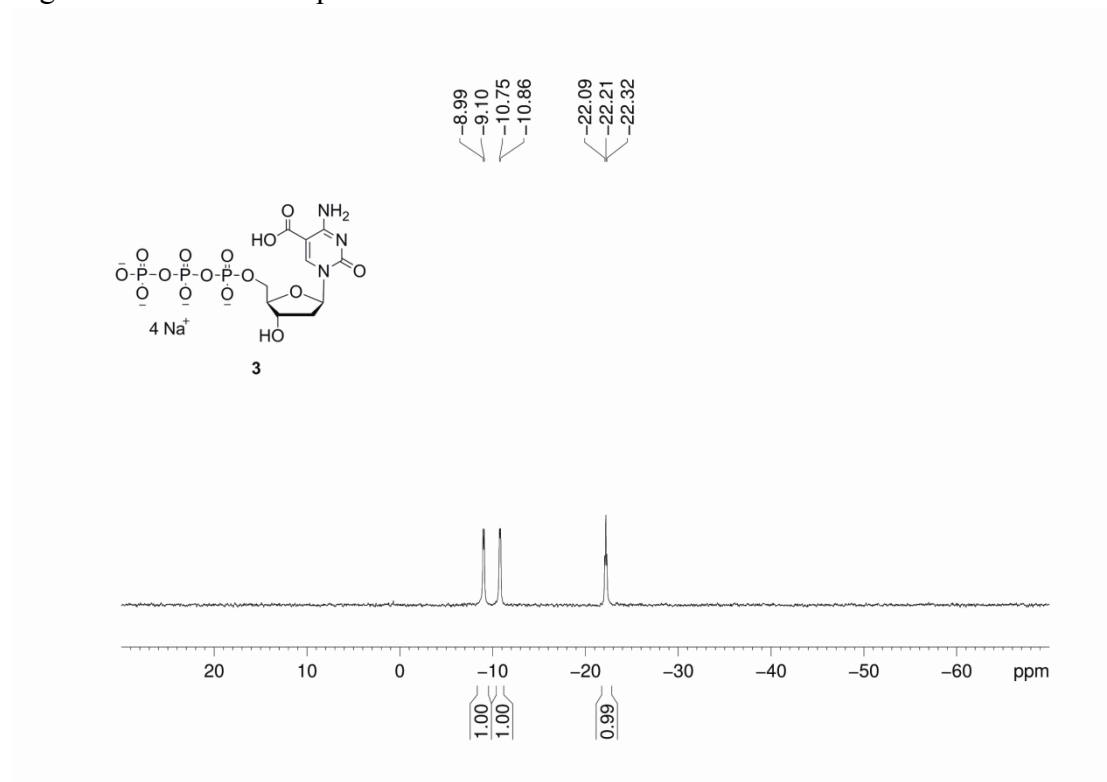

#### 4. References.

1. M. D. Bartholomä, A. R. Vorthers, S. Hillier, J. Joyal, J. Vabich, R. P. Doyle and J. Zubieta, *Dalton Trans.*, 2011, **40**, 6216.
2. V. J. Davisson, A. B. Woodside, T. R. Neal, K. E. Stremler, M. Muehlbacher, C. D. Poulter, *J. Org. Chem.*, 1986, **51**, 4768.
